# Supplementary material for: Overexpression of flv3 improves photosynthesis in the cyanobacterium Synechocystis sp. PCC6803 by enhancement of alternative electron flow
Source: PubMed Central journal article supplement (PMC4300077; doi:10.1186/s13068-014-0183-x), 2014-12-31
Supplement: 13068_2014_183_MOESM1_ESM.pdf [file 13068_2014_183_MOESM1_ESM.pdf]

**Additional file 1 - Concentration of cellular biomass cultivated under 120  $\mu\text{mol photons m}^{-2} \text{s}^{-1}$  light intensity and 1%  $\text{CO}_2$  conditions.**

| Time (day) | Biomass (g-DCW L <sup>-1</sup> ) |                          |                           |
|------------|----------------------------------|--------------------------|---------------------------|
|            | GT                               | Flv3ox                   | VC                        |
| 3          | 0.95 ± 0.07 <sup>ab</sup>        | 1.07 ± 0.14 <sup>a</sup> | 0.82 ± 0.032 <sup>b</sup> |
| 4          | 1.59 ± 0.21 <sup>a</sup>         | 2.01 ± 0.22 <sup>b</sup> | 1.42 ± 0.06 <sup>a</sup>  |
| 5          | 2.09 ± 0.12 <sup>a</sup>         | 2.46 ± 0.07 <sup>b</sup> | 2.17 ± 0.07 <sup>a</sup>  |
| 6          | 2.30 ± 0.09 <sup>a</sup>         | 3.11 ± 0.26 <sup>b</sup> | 2.50 ± 0.05 <sup>a</sup>  |
| 7          | 2.48 ± 0.20 <sup>a</sup>         | 3.20 ± 0.18 <sup>b</sup> | 2.74 ± 0.20 <sup>a</sup>  |

Difference in biomass concentration was statistically analysed by one-way ANOVA. A *post hoc* Tukey's Honestly Significant Difference test was carried out on the grouped means. Values are the averages from measurements of ten different cell cultures, ±SD.

Values followed by the same letter are not significantly different ( $P > 0.01$ ).
